# Supplementary material for: Diversity of Monofloral Honey Based on the Antimicrobial and Antioxidant Potential
Source: MDPI journal article supplement (doi:10.3390/antibiotics11050595), 2022-04-28
Supplement: s1 [file s1]

BGR/MGR (%) values of honey samples on clinical isolates

|        | <i>E.coli</i> ( 2023) | <i>E. coli</i> (2067) | <i>E. coli</i> (21117) | <i>M. pachydermatis</i> | <i>M. pachydermatis</i> | <i>B. cepacia</i> (2195) | <i>B. cepacia</i> (21952) | <i>P. vulgaris</i> (20624) | <i>P. vulgaris</i> (20124) | <i>P. vulgaris</i> (2147) | <i>P. aeruginosa</i> (19117) | <i>P. aeruginosa</i> (191211) | <i>P. aeruginosa</i> (20129) | <i>P. aeruginosa</i> (20722) | <i>P. aeruginosa</i> (21615). |
|--------|-----------------------|-----------------------|------------------------|-------------------------|-------------------------|--------------------------|---------------------------|----------------------------|----------------------------|---------------------------|------------------------------|-------------------------------|------------------------------|------------------------------|-------------------------------|
| MH 10% | 84.83                 | 90.72                 | 88.66                  | 118.20                  | 119.66                  | 134.36                   | 134.73                    | 132.91                     | 82.92                      | 89.17                     | 102.32                       | 97.76                         | 95.09                        | 99.73                        | 99.56                         |
| MH 15% | 58.45                 | 75.52                 | 62.08                  | 62.04                   | 80.51                   | 102.78                   | 110.19                    | 125.69                     | 55.20                      | 77.56                     | 84.68                        | 96.49                         | 91.81                        | 92.66                        | 96.39                         |
| MH 20% | 25.09                 | 50.82                 | 45.37                  | 28.86                   | 59.41                   | 84.19                    | 82.74                     | 125.94                     | 29.63                      | 66.33                     | 73.03                        | 91.33                         | 73.98                        | 74.33                        | 69.51                         |
| BH 10% | 103.91                | 101.86                | 112.16                 | 81.42                   | 89.24                   | 124.57                   | 131.75                    | 134.72                     | 59.46                      | 89.91                     | 108.81                       | 112.70                        | 111.33                       | 109.48                       | 117.22                        |
| BH 15% | 75.54                 | 85.54                 | 88.48                  | 58.83                   | 80.39                   | 113.91                   | 129.65                    | 122.92                     | 40.08                      | 67.94                     | 70.78                        | 99.96                         | 104.60                       | 69.11                        | 87.12                         |
| BH 20% | 54.20                 | 75.52                 | 68.54                  | 57.25                   | 69.67                   | 89.98                    | 108.02                    | 91.74                      | 44.78                      | 60.10                     | 48.85                        | 62.01                         | 58.54                        | 41.42                        | 74.00                         |
| AH 10% | 87.99                 | 85.22                 | 98.91                  | 58.14                   | 83.89                   | 128.87                   | 121.44                    | 130.52                     | 121.11                     | 128.96                    | 82.71                        | 112.95                        | 110.26                       | 106.21                       | 108.60                        |
| AH 15% | 81.12                 | 75.51                 | 91.69                  | 51.22                   | 63.52                   | 101.71                   | 116.17                    | 119.49                     | 71.24                      | 81.51                     | 79.49                        | 98.88                         | 90.47                        | 81.81                        | 87.30                         |
| AH 20% | 45.24                 | 48.48                 | 76.34                  | 47.04                   | 57.60                   | 83.53                    | 84.93                     | 99.16                      | 61.86                      | 66.44                     | 31.14                        | 93.64                         | 87.82                        | 45.98                        | 63.59                         |
| LH 10% | 97.63                 | 97.59                 | 97.80                  | 65.11                   | 80.39                   | 128.41                   | 134.76                    | 114.43                     | 70.23                      | 89.17                     | 141.09                       | 122.05                        | 113.70                       | 137.48                       | 134.26                        |
| LH 15% | 63.56                 | 69.85                 | 78.77                  | 53.52                   | 52.66                   | 115.79                   | 130.42                    | 92.96                      | 65.38                      | 75.42                     | 102.99                       | 98.79                         | 98.29                        | 104.24                       | 123.55                        |
| LH 20% | 48.93                 | 52.35                 | 60.88                  | 52.02                   | 63.14                   | 92.93                    | 90.88                     | 94.21                      | 45.82                      | 54.40                     | 39.62                        | 87.01                         | 81.78                        | 61.80                        | 77.36                         |
| C      | 100.02                | 99.98                 | 99.98                  | 100.04                  | 100.02                  | 100.00                   | 100.02                    | 100.40                     | 100.00                     | 99.98                     | 100.05                       | 100.04                        | 100.04                       | 100.02                       | 100.05                        |

BGR/MGR (%) values of honey samples on ATCC strains

| The concentrati of honey % | <i>S. pyogenes</i> (ATCC 19615) | <i>S. aureus</i> (ATCC 25923) | <i>S. flexneri</i> (ATCC 12022) | <i>P. aeruginosa</i> (ATCC 27853) | <i>E. coli</i> (ATCC 25922) | <i>S. typhimurium</i> (ATCC 14028) | <i>H. influenzae</i> (ATCC 10211) | <i>C. parapsilopsis</i> (ATCC 22019) | <i>C. albicans</i> (ATCC 10231) |
|----------------------------|---------------------------------|-------------------------------|---------------------------------|-----------------------------------|-----------------------------|------------------------------------|-----------------------------------|--------------------------------------|---------------------------------|
| MH 10                      | 79.99                           | 88.18                         | 96.05                           | 100.10                            | 96.04                       | 78.14                              | 53.93                             | 88.66                                | 92.15                           |
| MH 15                      | 77.10                           | 80.56                         | 93.86                           | 118.31                            | 74.94                       | 86.10                              | 65.13                             | 93.95                                | 86.26                           |
| MH 20                      | 67.73                           | 77.37                         | 90.01                           | 120.46                            | 66.16                       | 86.29                              | 70.22                             | 100.97                               | 72.91                           |
| BH 10                      | 91.53                           | 98.67                         | 95.01                           | 98.81                             | 74.58                       | 86.77                              | 78.03                             | 99.57                                | 81.35                           |
| BH 15                      | 94.89                           | 99.73                         | 89.35                           | 86.07                             | 83.05                       | 88.30                              | 85.15                             | 120.19                               | 94.80                           |
| BH 20                      | 97.40                           | 104.85                        | 76.83                           | 77.98                             | 94.17                       | 93.67                              | 91.70                             | 131.32                               | 98.72                           |
| AH 10                      | 103.92                          | 98.03                         | 104.68                          | 118.94                            | 98.58                       | 117.16                             | 91.00                             | 140.93                               | 75.86                           |
| AH 15                      | 98.98                           | 108.89                        | 123.73                          | 97.08                             | 73.74                       | 108.72                             | 94.77                             | 130.24                               | 80.47                           |
| AH 20                      | 88.97                           | 112.73                        | 125.98                          | 90.75                             | 68.87                       | 88.69                              | 94.91                             | 119.98                               | 88.62                           |
| LH 10                      | 112.52                          | 116.24                        | 91.47                           | 118.81                            | 86.35                       | 136.82                             | 73.83                             | 114.33                               | 111.25                          |
| LH 15                      | 102.55                          | 123.80                        | 86.19                           | 119.60                            | 93.18                       | 116.75                             | 78.94                             | 121.53                               | 106.97                          |
| LH 20                      | 96.64                           | 126.78                        | 82.34                           | 120.80                            | 94.37                       | 100.58                             | 84.91                             | 127.75                               | 102.00                          |
| C                          | 100.00                          | 100.05                        | 100.00                          | 100.03                            | 100.03                      | 100.00                             | 100.00                            | 99.96                                | 100.00                          |
